# Supplementary material for: Chemical synthesis of unique intermetallic TiFe nanostructures originating from the morphology of oxide precursors
Source: Nanoscale Adv. 2021 Jul 13;3(18):5284–91. doi: 10.1039/d1na00251a (PMC9417203; doi:10.1039/d1na00251a)
Supplement: NA-003-D1NA00251A-s001 [file NA-003-D1NA00251A-s001.pdf]

## Electronic Supplementary Information

### Chemical Synthesis of Unique Intermetallic TiFe Nanostructures Originating from the Morphology of Oxide Precursors

Yasukazu Kobayashi <sup>\*,a</sup>, Heng Yi Teah <sup>b</sup>, and Nobuko Hanada <sup>c</sup>

**a** Interdisciplinary Research Center for Catalytic Chemistry, National Institute of Advanced Industrial Science and Technology (AIST), 1-1-1 Higashi, Tsukuba, Ibaraki 305-8565, Japan

E-mail: [yasu-kobayashi@aist.go.jp](mailto:yasu-kobayashi@aist.go.jp)

**b** Waseda Research Institute for Science and Engineering, Waseda University, Tokyo 169-8555, Japan

**c** Department of Applied Chemistry, Waseda University, 3-4-1 Okubo, Shinjuku-ku, Tokyo, 169-8555, Japan

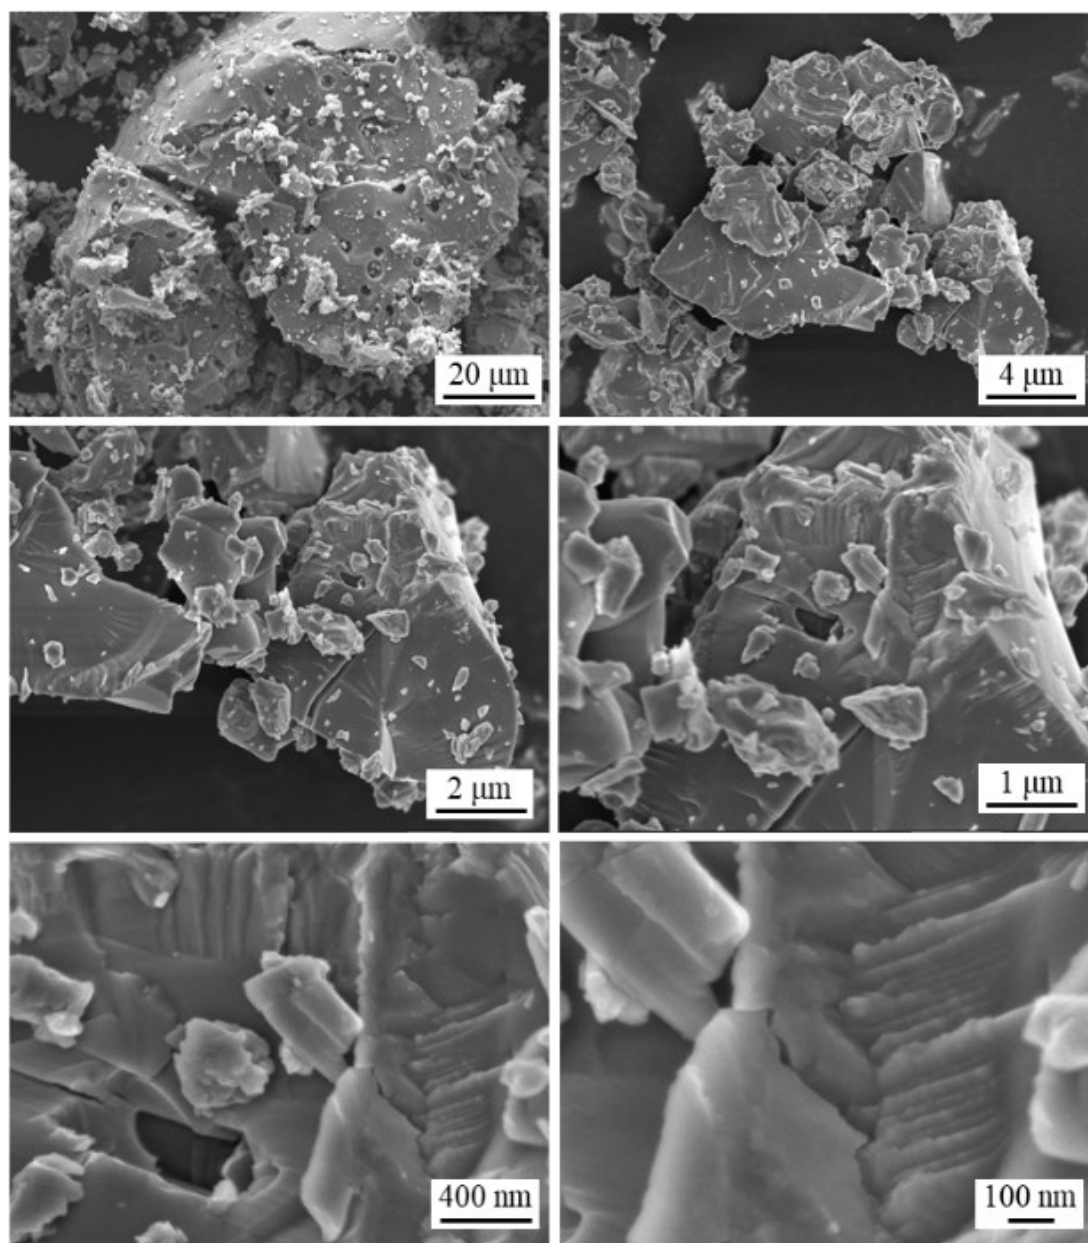

**Fig. S1** SEM images for commercial  $\text{FeTiO}_3$ .

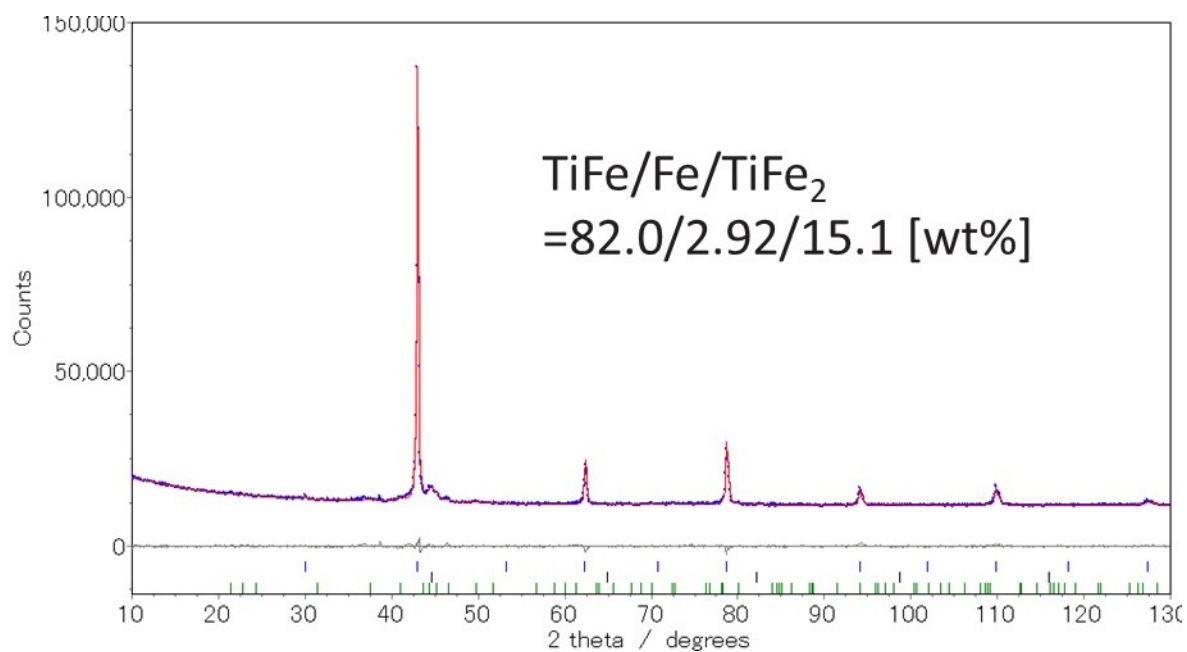

**Fig. S2** Rietveld refinement results for TiFe(RDT-FTO). Observed (blue dots), calculated (red line), and difference (gray line) profiles are presented. The vertical bars at the bottom show the calculated positions for TiFe (blue), Fe (black) and TiFe<sub>2</sub> (green).

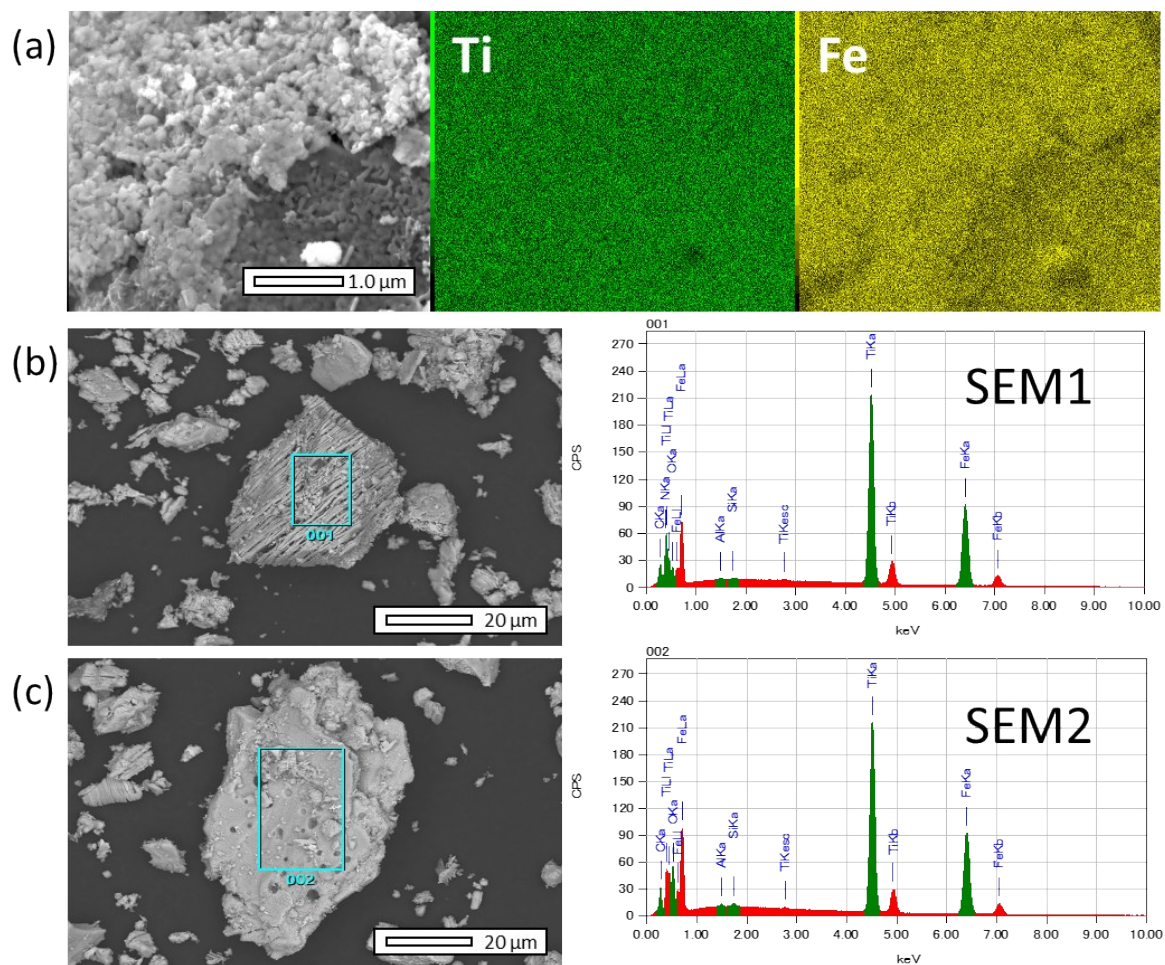

**Fig. S3** (a) Elemental mappings and SEM-EDS analysis at two positions of (b) SEM1 and (c) SEM2 for TiFe (RDT-FTO).

**Table S1** Molar ratios of detected elements by SEM-EDS for TiFe (RDT-FTO) and TiFe (RDT-TO).

| Sample        | Molar ratio of detected elements [mol%] |       |       |       |      |      |      |
|---------------|-----------------------------------------|-------|-------|-------|------|------|------|
|               | Method <sup>a)</sup>                    | Ti    | Fe    | O     | Al   | Si   | Ca   |
| TiFe(RDT-FTO) | SEM1                                    | 46.34 | 49.14 | 4.27  | 0.17 | 0.08 | -    |
|               | SEM2                                    | 43.06 | 45.46 | 11.07 | 0.18 | 0.23 | -    |
| TiFe(RDT-TO)  | SEM1                                    | 43.59 | 47.52 | 8.19  | 0.14 | 0.21 | 0.35 |
|               | SEM2                                    | 43.50 | 46.40 | 9.28  | 0.19 | 0.33 | 0.30 |

a) Element ratios were measured at 2 different positions of SEM1 and SEM2 for both samples.

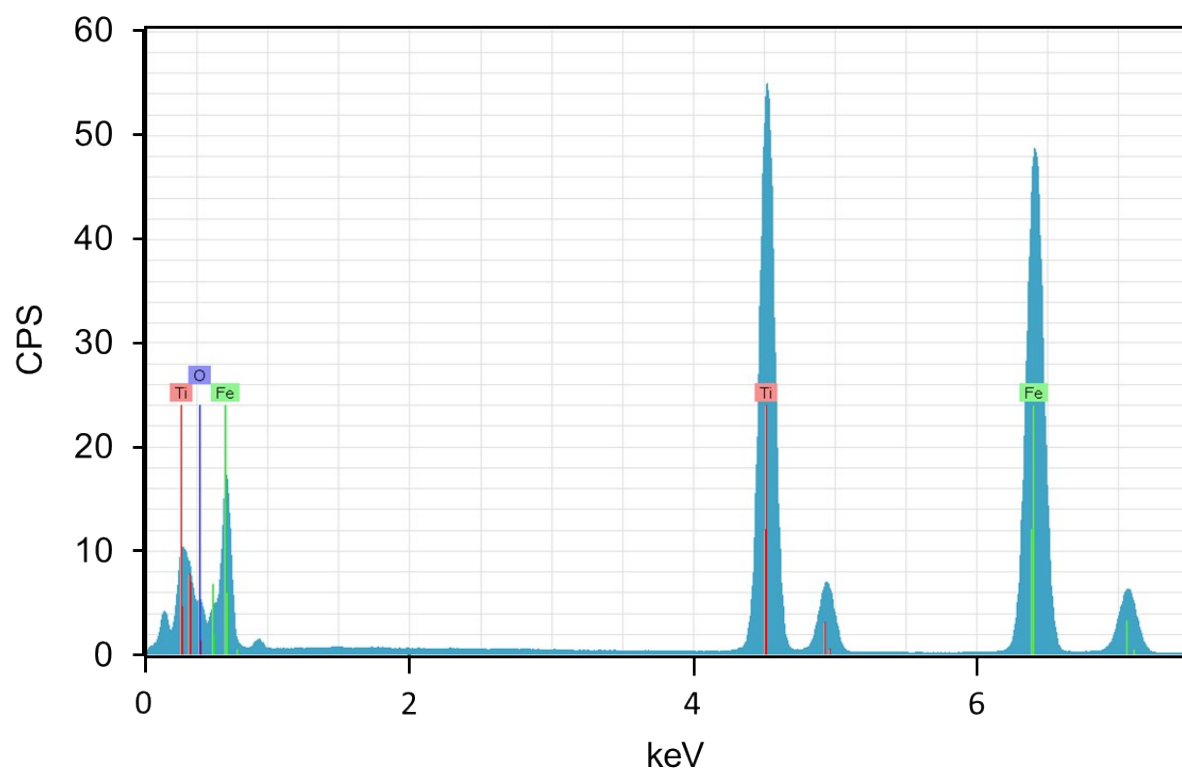

**Fig. S4** TEM-EDS spectrum observed at a marked position in Fig. 2(b) for TiFe (RDT-FTO).

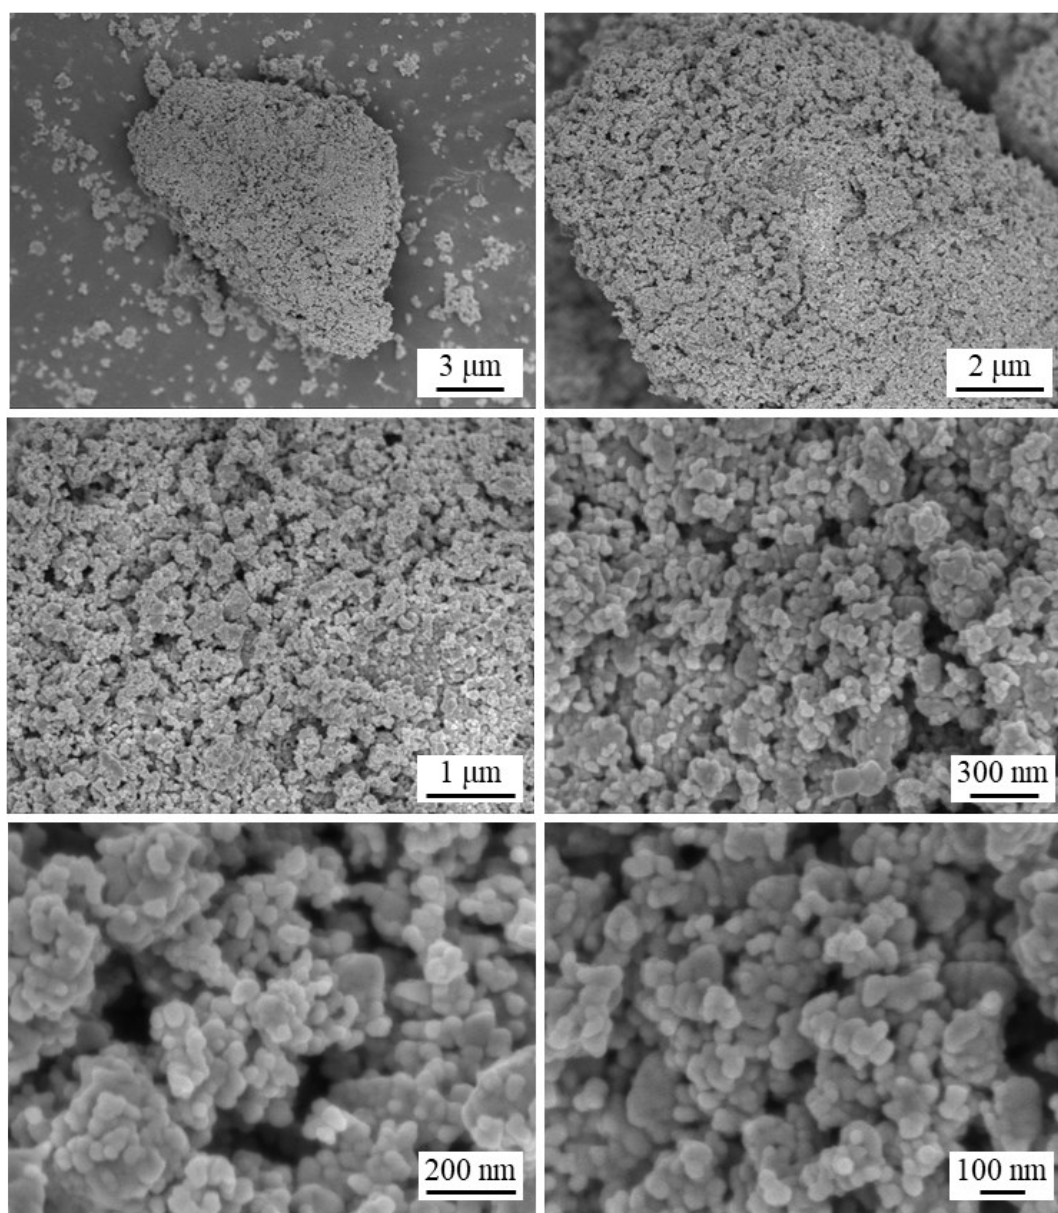

**Fig. S5** SEM images for TiFe (Pre-TO).

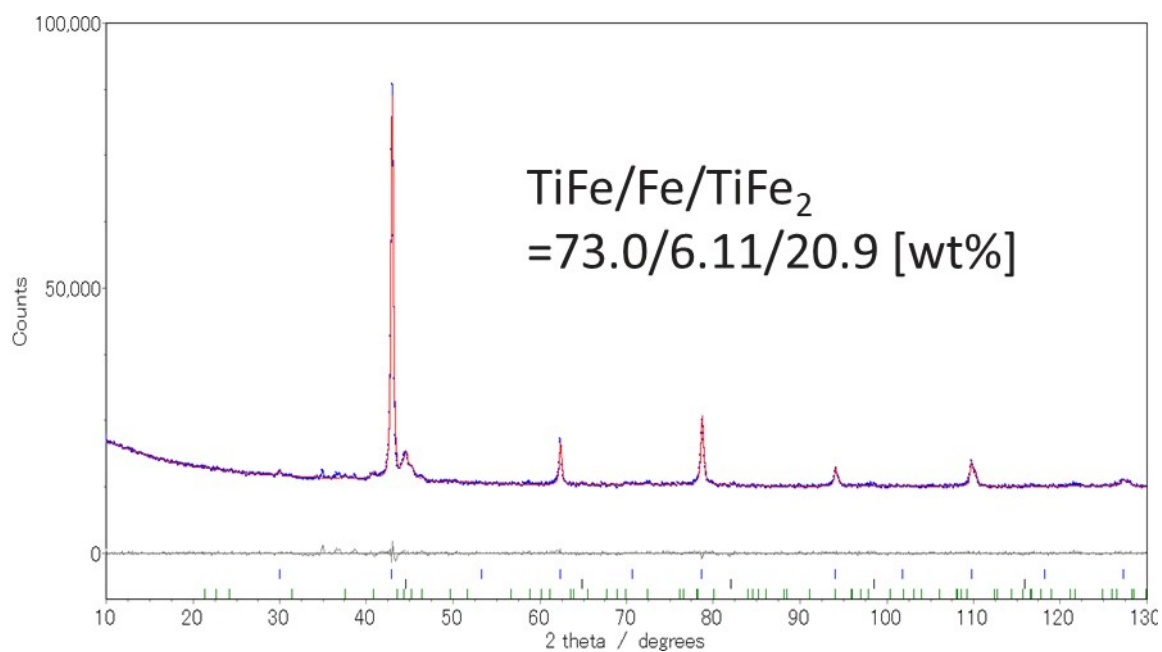

**Fig. S6** Rietveld refinement results for TiFe(RDT-TO). Observed (blue dots), calculated (red line), and difference (gray line) profiles are presented. The vertical bars at the bottom show the calculated positions for TiFe (blue), Fe (black) and TiFe<sub>2</sub> (green).

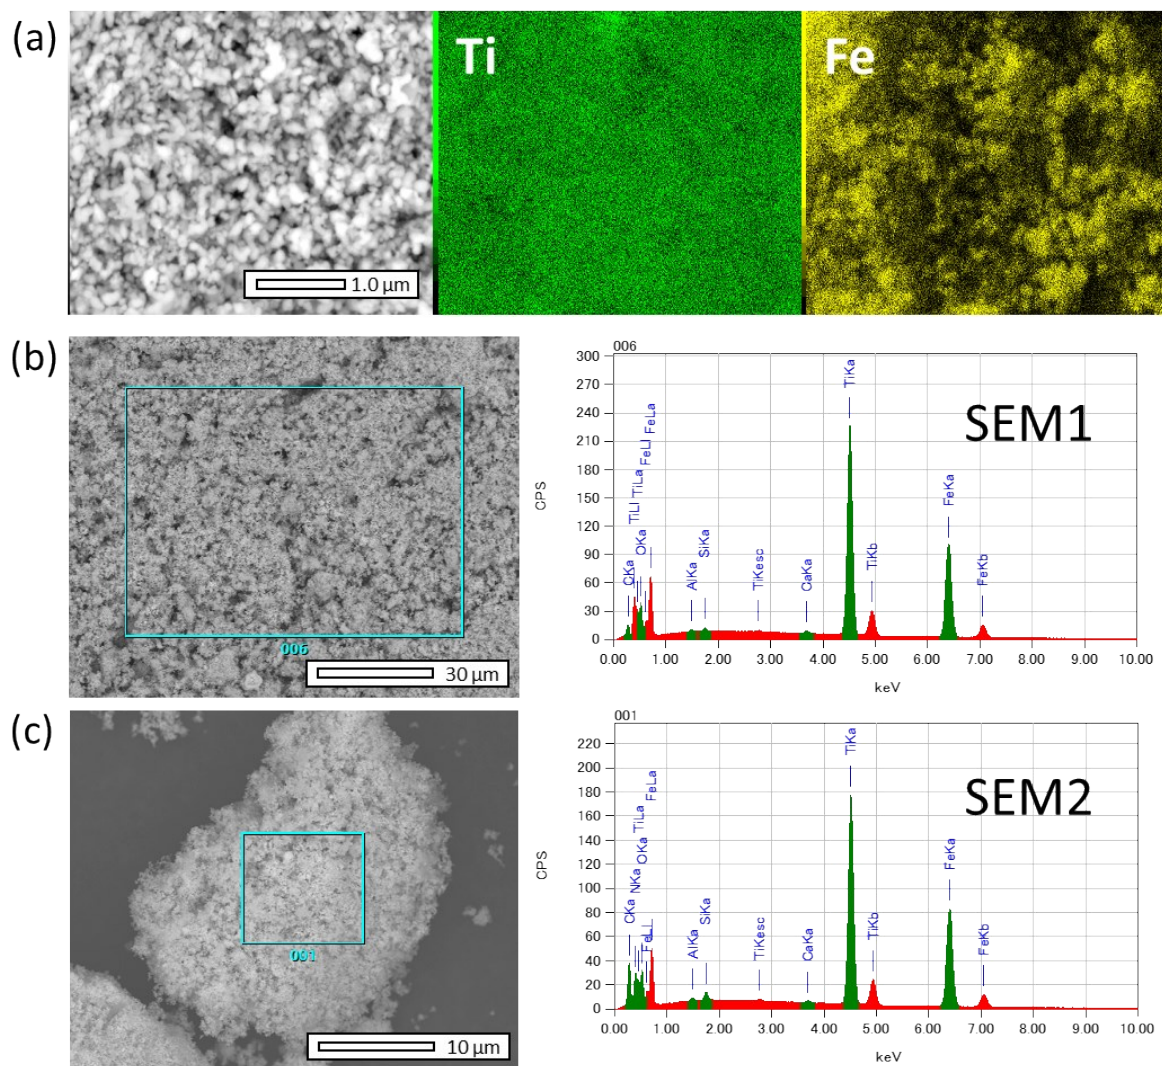

**Fig. S7** (a) Elemental mappings and SEM-EDS analysis at two positions of (b) SEM1 and (c) SEM2 for TiFe (RDT-TO).

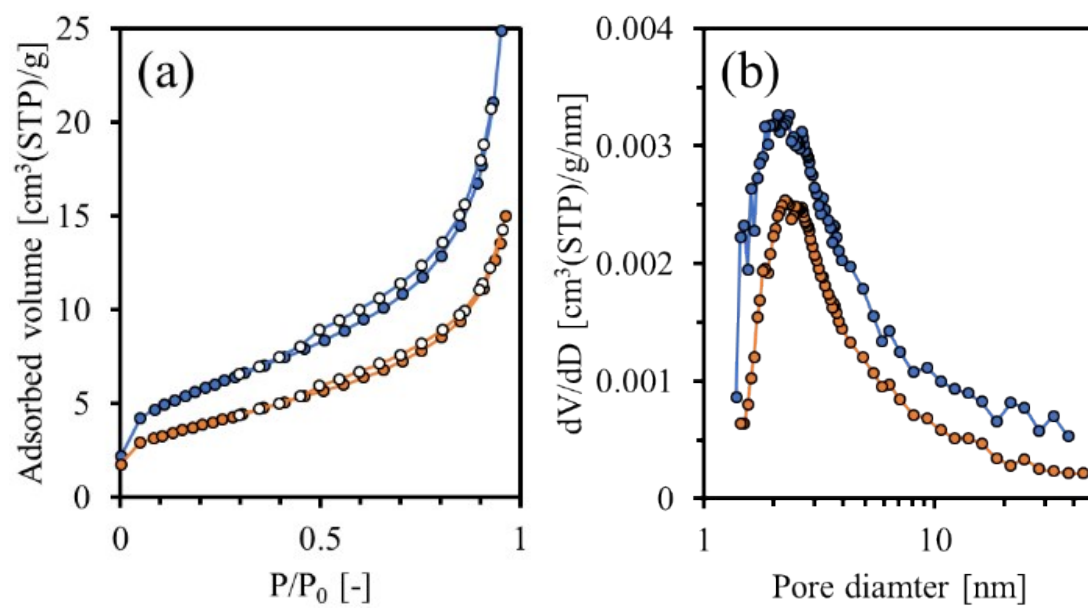

**Fig. S8** (a) Adsorption and desorption isotherms of nitrogen and (b) pore size distributions. Orange: TiFe (RDT-FTO), Blue: TiFe (RDT-TO).
